# Supplementary material for: Gut microbiota signatures are associated with toxicity to combined CTLA-4 and PD-1 blockade
Source: Research Square preprint supplement (doi:10.21203/rs.3.rs-119925/v1), 2020-12-07
Supplement: Supplementary file 1 [file a140af010c243935677bea9c.docx]

**Supplementary Data Table 1: Patient characteristics.**

| **CHARACTERISTIC**  number (%) or median [range] | **TOTAL COHORT**  **n=77** | **CUTANEOUS**  **n=63** | **MUCOSAL**  **n=8** | **UVEAL**  **n=6** |
| --- | --- | --- | --- | --- |
| **Sex** (number, %) |  |  |  |  |
| Male | 51 (66%) | 46 (73%) | 3 (37%) | 2 (33%) |
| Female | 26 (34%) | 17 (27%) | 5 (63%) | 4 (67%) |
| **Age** (median, range) | 59 [27-86] | 55 [27-86] | 63.5 [59-79] | 60.5 [30-74] |
| **Melanoma type** (number, %) |  |  |  |  |
| Cutaneous unspecified | 22 (29%) | 22 (35%) | - | - |
| Superficial spreading | 9 (12%) | 9 (14%) | - | - |
| Acral lentiginous | 1 (1%) | 1 (2%) | - | - |
| Lentigo maligna melanoma | 4 (5%) | 4 (6%) | - | - |
| Nodular | 10 (13%) | 10 (16%) | - | - |
| Spindle cell | 1 (1%) | 1 (2%) | - | - |
| In situ | 1 (1%) | 1 (2%) | - | - |
| Unknown primary | 15 (19%) | 15 (24%) | - | - |
| Mucosal | 8 (10%) | - | 8 (100%) | - |
| Uveal | 6 (8%) | - | - | 6 (100%) |
| **Disease stage (AJCCv7)** (number, %) |  |  |  |  |
| IIc | 1 (1%) | 0 | 1 (12%) | 0 |
| IIIa/b | 2 (3%) | 2 (3%) | 0 | 0 |
| IIIc | 9 (12%) | 8 (13%) | 1 (13%) | 0 |
| IVa | 6 (8%) | 2 (3%) | 1 (13%) | 3 (50%) |
| IVb | 16 (21%) | 12 (19%) | 2 (25%) | 2 (33%) |
| IVc | 43 (55%) | 39 (62%) | 3 (37%) | 1 (17%) |
| **LDH at baseline** (number, %) |  |  |  |  |
| Normal range | 51 (66%) | 41 (65%) | 7 (88%) | 3 (50%) |
| Elevated | 17 (22%) | 14 (22%) | 1 (12%) | 2 (33%) |
| NA | 9 (12%) | 8 (13%) | 0 | 1 (17%) |
| **BRAF V600 status** (number, %) |  |  |  |  |
| wt | 35 (45%) | 24 (38%) | 8 (100%) | 3 (50%) |
| V600E | 23 (30%) | 23 (36%) | 0 | 0 |
| V600K | 8 (10%) | 8 (13%) | 0 | 0 |
| V600R | 1 (1%) | 1 (2%) | 0 | 0 |
| V600 mutated, unspecified | 3 (4%) | 3 (5%) | 0 | 0 |
| NA | 7 (9%) | 4 (6%) | 0 | 3 (50%) |
| **Prior lines of systemic therapy for advanced disease** (number, %) | 0 [0-7] |  |  |  |
| 0 | 57 (74%) | 47 (75%) | 5 (63%) | 5 (83%) |
| 1 | 10 (13%) | 8 (13%) | 2 (25%) | 0 |
| 2 | 3 (4%) | 2 (2%) | 0 | 1 (17%) |
| ≥3 | 7 (9%) | 6 (10%) | 1 (12%) | 0 |
| **Prior immunotherapy** (number, %) | 16 (21%) | 13 (21%) | 3 (38%) | 0 |
| Cytokine | 10 (13%) | 8 (13%) | 2 (25%) | 0 |
| Ipilimumab | 5 (6%) | 4 (6%) | 1 (13%) | 0 |
| Anti-PD-1/anti-PD-L1 | 9 (12%) | 8 (13%) | 1 (13%) | 0 |
| Adjuvant/neoadjuvant setting | 6 (8%) | 5 (8%) | 1 (13%) | 0 |
| None | 61 (79%) | 50 (79%) | 5 (63%) | 6 (100%) |

**Supplementary Data Table 2: Clinical outcomes.**

|  |  |  |  |  | **CICB RESPONSE*** | |
| --- | --- | --- | --- | --- | --- | --- |
| **CHARACTERISTIC**  number (%) or median [range] | **TOTAL COHORT**  n=77 | **CUTANEOUS**  n=63 | **MUCOSAL**  n=8 | **UVEAL**  n=6 | **R**  n=47 | **NR**  n=30 |
| **Doses received** |  |  |  |  |  |  |
| ipilimumab + anti-PD-1 | 3 [1-4] | 4 [1-4] | 2.5 [1-4] | 3 [2-4] | 4 [1-4] | 3 [1-4] |
| maintenance anti-PD-1 | 2 [0-58] | 3 [0-58] | 2 [0-12] | 0 [0-15] | 12 [0-58] | 0 [0-16] |
| **Best overall response [RECIST 1.1]** |  |  |  |  |  |  |
| CR | 14 (18%) | 14 (22%) | 0 | 0 |  |  |
| PR | 33 (43%) | 31 (49%) | 2 (25%) | 0 |  |  |
| SD | 8 (10%) | 5 (8%) | 1 (13%) | 2 (33%) |  |  |
| PD | 22 (29%) | 13 (21%) | 5 (62%) | 4 (67%) |  |  |
| **Maximum grade AE** |  |  |  |  |  |  |
| 0 | 5 (6%) | 4 (6%) | 1 (13%) | 0 | 1 (2%) | 4 (13%) |
| 1 | 14 (18%) | 10 (16%) | 1 (13%) | 3 (50%) | 8 (17%) | 6 (20%) |
| 2 | 20 (26%) | 16 (25%) | 3 (37%) | 1 (17%) | 10 (21%) | 10 (33%) |
| 3 | 33 (43%) | 28 (44%) | 3 (37%) | 2 (33%) | 23 (49%) | 10 (33%) |
| 4 | 5 (6%) | 5 (8%) | 0 | 0 | 5 (11%) | 0 |
| **High-grade (≥Grade 3) irAE [CTCAE v4.0]** |  |  |  |  |  |  |
| All types | 38 (49%) | 33 (52%) | 3 (38%) | 2 (33%) | 28 (60%) | 10 (33%) |
| Liver | 15 (19%) | 13 (21%) | 1 (13%) | 1 (17%) | 12 (26%) | 3 (10%) |
| Diarrhea/colitis | 11 (14%) | 9 (14%) | 1 (13%) | 1 (17%) | 8 (17%) | 3 (10%) |
| Skin | 6 (8%) | 5 (8%) | 1 (13%) | 0 | 5 (11%) | 1 (3%) |
| Lung | 5 (6%) | 5 (8%) | 0 | 0 | 4 (9%) | 1 (3%) |
| Thyroid | 1 (1%) | 1 (2%) | 0 | 0 | 1 (2%) | 0 |

Percentages are expressed relative to the number of patients within each indicated group. Ties in medians are indicated by non-integer values.

*R=best overall response of PR+CR, NR = best overall response of SD+PD.

**Supplementary Data Table 3: Biospecimen use overview.**

|  |  |  |  |  |  | **TCR Seq: Tumor** | | **TCR Seq: Blood** | | | **IHC: Tumor** | | **Flow Cytometry: Blood** | | | | **Feces** | |
| --- | --- | --- | --- | --- | --- | --- | --- | --- | --- | --- | --- | --- | --- | --- | --- | --- | --- | --- |
| **Final ID** | **Group** | **Prior Immuno** | **Gr3+ irAE** | **BOR** | **WES** | **Pre** | **Post** | **Pre** | **On** | **Post** | **Pre** | **Post** | **Pre** | **Early** | **Late** | **Post** | **16S** | **WMS** |
| 1 | cutaneous | N | Y | PD | 0 | 1 | 1 | 0 | 1 | 0 | 0 | 1 | 1 | 1 | 1 | 1 | 0 | 0 |
| 2 | cutaneous | N | N | CR | 1 | 1 | 0 | 0 | 0 | 0 | 1 | 0 | 0 | 0 | 0 | 0 | 0 | 0 |
| 3 | cutaneous | N | N | CR | 1 | 1 | 0 | 1 | 0 | 0 | 1 | 0 | 1 | 0 | 0 | 0 | 0 | 0 |
| 4 | cutaneous | N | Y | CR | 1 | 1 | 0 | 1 | 0 | 1 | 1 | 0 | 1 | 1 | 1 | 1 | 0 | 0 |
| 5 | cutaneous | N | Y | PR | 0 | 1 | 1 | 1 | 1 | 0 | 1 | 0 | 1 | 1 | 1 | 0 | 1 | 1 |
| 6 | cutaneous | Y | N | CR | 1 | 1 | 0 | 1 | 0 | 1 | 1 | 0 | 1 | 1 | 0 | 1 | 0 | 0 |
| 7 | cutaneous | Y | N | PR | 1 | 1 | 1 | 1 | 0 | 1 | 1 | 1 | 1 | 1 | 1 | 1 | 0 | 0 |
| 8 | cutaneous | N | N | PD | 1 | 0 | 1 | 1 | 0 | 1 | 1 | 0 | 1 | 1 | 1 | 1 | 1 | 1 |
| 9 | cutaneous | N | Y | CR | 1 | 1 | 0 | 1 | 0 | 0 | 1 | 0 | 1 | 1 | 0 | 1 | 1 | 1 |
| 10 | cutaneous | N | N | PD | 0 | 1 | 0 | 0 | 0 | 0 | 0 | 0 | 0 | 0 | 0 | 0 | 0 | 0 |
| 11 | cutaneous | N | N | CR | 1 | 1 | 0 | 1 | 1 | 1 | 1 | 0 | 0 | 0 | 0 | 1 | 1 | 1 |
| 12 | cutaneous | N | Y | CR | 1 | 1 | 0 | 0 | 0 | 0 | 1 | 0 | 0 | 0 | 0 | 0 | 0 | 0 |
| 13 | cutaneous | N | Y | PD | 0 | 0 | 1 | 0 | 0 | 1 | 0 | 1 | 0 | 0 | 0 | 0 | 0 | 0 |
| 14 | cutaneous | N | Y | PR | 1 | 1 | 0 | 1 | 0 | 0 | 1 | 0 | 1 | 1 | 0 | 1 | 0 | 0 |
| 15 | cutaneous | N | Y | PR | 0 | 0 | 1 | 1 | 0 | 1 | 0 | 0 | 1 | 1 | 1 | 1 | 1 | 1 |
| 16 | cutaneous | N | N | PR | 1 | 1 | 0 | 1 | 1 | 1 | 0 | 0 | 1 | 1 | 1 | 1 | 0 | 0 |
| 17 | cutaneous | N | Y | PR | 0 | 0 | 0 | 1 | 0 | 1 | 0 | 0 | 1 | 1 | 1 | 1 | 1 | 1 |
| 18 | cutaneous | N | Y | PR | 0 | 0 | 0 | 0 | 0 | 1 | 0 | 0 | 1 | 1 | 1 | 0 | 0 | 0 |
| 19 | cutaneous | Y | N | PR | 1 | 1 | 0 | 1 | 0 | 1 | 1 | 0 | 1 | 1 | 0 | 1 | 0 | 0 |
| 20 | cutaneous | Y | N | PD | 1 | 1 | 0 | 0 | 0 | 0 | 1 | 0 | 0 | 0 | 0 | 0 | 0 | 0 |
| 21 | cutaneous | N | Y | CR | 0 | 0 | 0 | 1 | 0 | 1 | 0 | 0 | 0 | 0 | 0 | 0 | 0 | 0 |
| 22 | cutaneous | N | Y | CR | 0 | 0 | 0 | 1 | 0 | 1 | 0 | 0 | 1 | 1 | 0 | 1 | 1 | 1 |
| 23 | cutaneous | N | Y | PR | 0 | 0 | 0 | 1 | 0 | 1 | 0 | 0 | 0 | 0 | 0 | 0 | 1 | 1 |
| 24 | cutaneous | N | Y | CR | 1 | 1 | 0 | 0 | 0 | 0 | 0 | 0 | 0 | 0 | 0 | 0 | 1 | 0 |
| 25 | cutaneous | N | N | PD | 1 | 1 | 0 | 0 | 0 | 0 | 1 | 0 | 1 | 1 | 0 | 0 | 0 | 0 |
| 26 | cutaneous | Y | N | PD | 1 | 1 | 1 | 0 | 0 | 0 | 1 | 1 | 0 | 0 | 1 | 0 | 1 | 1 |
| 27 | cutaneous | Y | N | PD | 1 | 1 | 0 | 0 | 0 | 0 | 1 | 0 | 0 | 0 | 0 | 0 | 0 | 0 |
| 28 | cutaneous | N | Y | PD | 1 | 0 | 0 | 0 | 0 | 0 | 1 | 0 | 0 | 0 | 0 | 0 | 1 | 1 |
| 29 | cutaneous | N | N | PR | 1 | 1 | 0 | 1 | 1 | 0 | 1 | 0 | 0 | 0 | 0 | 0 | 0 | 0 |
| 30 | cutaneous | Y | N | PR | 1 | 1 | 0 | 1 | 1 | 0 | 1 | 0 | 1 | 1 | 0 | 0 | 1 | 1 |
| 40 | cutaneous | N | Y | PR | 0 | 0 | 0 | 0 | 0 | 0 | 0 | 0 | 1 | 1 | 0 | 0 | 1 | 1 |
| 31 | cutaneous | Y | N | PR | 0 | 0 | 0 | 0 | 0 | 0 | 1 | 0 | 0 | 0 | 0 | 0 | 0 | 0 |
| 32 | cutaneous | N | Y | PR | 1 | 0 | 0 | 0 | 0 | 0 | 1 | 0 | 0 | 0 | 0 | 0 | 0 | 0 |
| 33 | cutaneous | Y | N | PR | 1 | 1 | 0 | 1 | 0 | 1 | 1 | 0 | 0 | 0 | 0 | 0 | 0 | 0 |
| 34 | cutaneous | N | N | SD | 1 | 1 | 0 | 1 | 0 | 0 | 1 | 0 | 0 | 0 | 0 | 0 | 0 | 0 |
| 35 | cutaneous | Y | Y | PR | 0 | 0 | 0 | 0 | 0 | 1 | 0 | 0 | 0 | 0 | 0 | 0 | 1 | 1 |
| 36 | cutaneous | N | Y | PR | 1 | 1 | 0 | 0 | 0 | 0 | 1 | 0 | 0 | 0 | 0 | 0 | 1 | 1 |
| 37 | cutaneous | N | Y | CR | 0 | 0 | 0 | 1 | 0 | 0 | 0 | 0 | 0 | 0 | 0 | 0 | 0 | 0 |
| 39 | cutaneous | N | N | PR | 1 | 0 | 0 | 1 | 0 | 0 | 0 | 0 | 0 | 0 | 0 | 0 | 1 | 1 |
| 38 | cutaneous | N | Y | CR | 1 | 1 | 0 | 1 | 0 | 0 | 1 | 0 | 1 | 1 | 1 | 0 | 1 | 1 |
| X1 | cutaneous | N | N | PR | 0 | 0 | 0 | 0 | 0 | 0 | 0 | 0 | 0 | 0 | 0 | 0 | 1 | 1 |
| X2 | cutaneous | Y | Y | PR | 0 | 0 | 0 | 0 | 0 | 0 | 0 | 0 | 0 | 0 | 0 | 0 | 1 | 1 |
| X3 | cutaneous | N | N | PR | 0 | 0 | 0 | 0 | 0 | 0 | 0 | 0 | 0 | 0 | 0 | 0 | 1 | 1 |
| X4 | cutaneous | N | Y | PR | 0 | 0 | 0 | 0 | 0 | 0 | 0 | 0 | 1 | 1 | 0 | 0 | 1 | 1 |
| X5 | cutaneous | N | N | PR | 0 | 0 | 0 | 0 | 0 | 0 | 0 | 0 | 0 | 0 | 0 | 0 | 1 | 1 |
| X6 | cutaneous | N | Y | PR | 0 | 0 | 0 | 0 | 0 | 0 | 0 | 0 | 1 | 1 | 0 | 0 | 1 | 1 |
| X7 | cutaneous | N | Y | PR | 0 | 0 | 0 | 0 | 0 | 0 | 0 | 0 | 0 | 0 | 0 | 0 | 1 | 1 |
| X8 | cutaneous | N | Y | PR | 0 | 0 | 0 | 0 | 0 | 0 | 0 | 0 | 0 | 0 | 0 | 0 | 1 | 1 |
| X9 | cutaneous | N | Y | PR | 0 | 0 | 0 | 0 | 0 | 0 | 0 | 0 | 0 | 0 | 0 | 0 | 1 | 1 |
| X10 | cutaneous | N | Y | PD | 0 | 0 | 0 | 0 | 0 | 0 | 0 | 0 | 0 | 0 | 0 | 0 | 1 | 1 |
| X11 | cutaneous | N | N | PD | 0 | 0 | 0 | 0 | 0 | 0 | 0 | 0 | 0 | 0 | 0 | 0 | 1 | 1 |
| X12 | cutaneous | N | N | PR | 0 | 0 | 0 | 0 | 0 | 0 | 0 | 0 | 1 | 1 | 0 | 0 | 1 | 1 |
| X13 | mucosal | N | N | PD | 0 | 0 | 0 | 0 | 0 | 0 | 0 | 0 | 0 | 0 | 0 | 0 | 1 | 1 |
| X14 | cutaneous | N | Y | CR | 0 | 0 | 0 | 0 | 0 | 0 | 0 | 0 | 0 | 0 | 0 | 0 | 1 | 0 |
| X15 | cutaneous | N | N | SD | 0 | 0 | 0 | 0 | 0 | 0 | 0 | 0 | 0 | 0 | 0 | 0 | 1 | 1 |
| X16 | cutaneous | N | N | PD | 0 | 0 | 0 | 0 | 0 | 0 | 0 | 0 | 0 | 0 | 0 | 0 | 1 | 1 |
| X17 | cutaneous | Y | Y | PD | 0 | 0 | 0 | 0 | 0 | 0 | 0 | 0 | 0 | 0 | 0 | 0 | 1 | 1 |
| X18 | cutaneous | N | Y | CR | 0 | 0 | 0 | 0 | 0 | 0 | 0 | 0 | 1 | 1 | 0 | 0 | 1 | 1 |
| X19 | cutaneous | N | N | PR | 0 | 0 | 0 | 0 | 0 | 0 | 0 | 0 | 0 | 0 | 0 | 0 | 1 | 1 |
| X20 | cutaneous | Y | N | PR | 0 | 0 | 0 | 0 | 0 | 0 | 0 | 0 | 0 | 0 | 0 | 0 | 1 | 1 |
| X21 | cutaneous | N | Y | PR | 0 | 0 | 0 | 0 | 0 | 0 | 0 | 0 | 0 | 0 | 0 | 0 | 1 | 1 |
| X22 | cutaneous | N | N | SD | 0 | 0 | 0 | 0 | 0 | 0 | 0 | 0 | 0 | 0 | 0 | 0 | 1 | 1 |
| X23 | cutaneous | N | N | SD | 0 | 0 | 0 | 0 | 0 | 0 | 0 | 0 | 0 | 0 | 0 | 0 | 1 | 1 |
| X24 | cutaneous | N | Y | SD | 0 | 0 | 0 | 0 | 0 | 0 | 0 | 0 | 0 | 0 | 0 | 0 | 1 | 1 |
| X25 | uveal | N | N | SD | 0 | 0 | 0 | 0 | 0 | 0 | 0 | 0 | 0 | 0 | 0 | 0 | 1 | 0 |
| X26 | uveal | N | N | SD | 0 | 0 | 0 | 0 | 0 | 0 | 0 | 0 | 0 | 0 | 0 | 0 | 1 | 0 |
| X27 | uveal | N | N | PD | 0 | 0 | 0 | 0 | 0 | 0 | 0 | 0 | 0 | 0 | 0 | 0 | 1 | 0 |
| X28 | uveal | N | N | PD | 0 | 0 | 0 | 0 | 0 | 0 | 0 | 0 | 0 | 0 | 0 | 0 | 1 | 0 |
| X29 | uveal | N | Y | PD | 0 | 0 | 0 | 0 | 0 | 0 | 0 | 0 | 0 | 0 | 0 | 0 | 1 | 0 |
| X30 | uveal | N | Y | PD | 0 | 0 | 0 | 0 | 0 | 0 | 0 | 0 | 0 | 0 | 0 | 0 | 1 | 0 |
| X31 | mucosal | Y | N | PD | 0 | 0 | 0 | 0 | 0 | 0 | 0 | 0 | 0 | 0 | 0 | 0 | 1 | 1 |
| X32 | mucosal | Y | N | PD | 0 | 0 | 0 | 0 | 0 | 0 | 0 | 0 | 0 | 0 | 0 | 0 | 1 | 1 |
| X33 | mucosal | N | N | PD | 0 | 0 | 0 | 0 | 0 | 0 | 0 | 0 | 0 | 0 | 0 | 0 | 1 | 1 |
| X34 | mucosal | N | N | PR | 0 | 0 | 0 | 0 | 0 | 0 | 0 | 0 | 0 | 0 | 0 | 0 | 1 | 1 |
| X35 | mucosal | N | Y | PR | 0 | 0 | 0 | 0 | 0 | 0 | 0 | 0 | 0 | 0 | 0 | 0 | 1 | 1 |
| X36 | mucosal | Y | Y | PD | 0 | 0 | 0 | 0 | 0 | 0 | 0 | 0 | 0 | 0 | 0 | 0 | 1 | 1 |
| X37 | mucosal | N | Y | SD | 0 | 0 | 0 | 0 | 0 | 0 | 0 | 0 | 0 | 0 | 0 | 0 | 1 | 1 |

**0**=specimen unavailable, **1**=specimen available.

**Supplementary Data Table 6: Multivariable adjustment of human fecal microbial candidates from whole metagenomic sequencing.**

|  | **Response*** | | | **Toxicity** | | |
| --- | --- | --- | --- | --- | --- | --- |
| **Univariate** | **Multivariable** | | **Univariate** | **Multivariable** | |
| **OR**  **(95% C.I.)** | **OR**  **(95% C.I.)** | **AIC** | **OR**  **(95% C.I)** | **OR**  **(95% C.I.)** | **AIC** |
| *Parabacteroides distasonis* | 3.88  (0.90-20.89) | 8.63  (1.19-179)† | 33.8 |  |  |  |
| *Bacteroides stercoris* | 2.19  (0.53-10.07) | 4.76  (0.932-36.5)& | 41.7 |  |  |  |
| *Bacteroides intestinalis* |  |  |  | 3.47  (1.01-13.36) | 4.54  (1.06-24.7)# | 53.9 |
| *Dorea formicigenerans* |  |  |  | 0.28  (0.08-0.92) | 0.35  (0.082-1.35)# | 62.6 |
| Age at entry |  |  |  |  |  |  |
| Sex (ref: female) |  |  |  |  |  |  |
| *BRAF* status (ref: WT) |  |  |  |  |  |  |
| LDH (ref: High) |  |  |  |  |  |  |
| AJCC stage (ref: stage 3/4) |  |  |  |  |  |  |
| Subtype (ref: cutaneous) |  |  |  |  |  |  |

Abundance of all candidate taxa were dichotomized at the median.

* only cutaneous melanoma patients were considered for models of response

† adjusted for baseline LDH status

& adjusted for sex and *BRAF* mutation status

# adjusted for age at entry and baseline LDH status

**Supplementary Data Table 7: Characteristics of patients in colitis sample cohort.**

|  | **ICB-treated**  n=13 | **Normal controls**  n=24 |
| --- | --- | --- |
| **Age** (median, range) | 72 [39-81] | 65 [44-92] |
| **Sex** (n, %) |  |  |
| M | 10 (77%) | 12 (50%) |
| F | 3 (23%) | 12 (50%) |
| **ICB agent(s)** (n, %) |  |  |
| anti-CTLA-4 | 4 (31%) | NA |
| anti-PD-1 | 3 (23%) | NA |
| CICB | 6 (46%) | NA |
| **Colitis Grade (CTCAEv4)** (n, %) |  |  |
| 3 | 3 (23%) | NA |
| 4 | 9 (69%) | NA |
| 3 and 4* | 1 (8%) | NA |
| **Colonic sampling** (#samples / #patients) |  |  |
| Inflamed sites | 21 / 12 | NA |
| Non-inflamed sites | 3 / 2 | 24 / 24 |

*one patient experienced two distinct episodes of colitis

**Supplementary Data Table 9: Characteristics of patients in MSKCC sample cohort.**

|  | **<Gr3 irAE**  n=25 | **≥Gr3 irAE**  n=27 |
| --- | --- | --- |
| **Age** (median, range) | 60 [39-78] | 60 [19-83] |
| **Sex** (n, %) |  |  |
| M | 15 (60%) | 17 (63%) |
| F | 10 (40%) | 10 (37%) |
| **Melanoma type** (n, %) |  |  |
| cutaneous | 10 (40%) | 22 (81%) |
| acral | 1 (4%) | 0 |
| unknown primary | 4 (16%) | 1 (4%) |
| mucosal | 9 (36%) | 4 (15%) |
| uveal | 1 (4%) | 0 |
| **Stage at first dose of CICB** (n, %) |  |  |
| III | 7 (28%) | 2 (8%) |
| IV M1a | 1 (4%) | 6 (22%) |
| IV M1b | 0 | 4 (15%) |
| IV M1c | 13 (52%) | 9 (33%) |
| IV M1d | 4 (16%) | 6 (22%) |
| **BRAF mutation status** (n, %) |  |  |
| V600E | 6 (24%) | 8 (30%) |
| V600K | 0 | 3 (11%) |
| V600 unspecified | 1 (4%) | 0 |
| non-V600 | 2 (8%) | 1 (4%) |
| wt | 13 (52%) | 13 (48%) |
| unknown | 3 (12%) | 2 (7%) |
| **LDH at baseline** (n, %) |  |  |
| not elevated | 12 (48%) | 10 (37%) |
| elevated | 7 (28%) | 7 (26%) |
| unknown | 6 (24%) | 10 (37%) |
